# Supplementary material for: Field comparison of dual- and single-spot Aethalometers: equivalent black carbon, light absorption, Ångström exponent and secondary brown carbon estimations
Source: Copernicus journal article supplement (doi:10.5194/amt-17-2917-2024), 2024-05-14
Supplement: Supplementary file 1 [file amt-17-2917-2024-supplement.pdf]

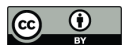

*Supplement of*

## **Field comparison of dual- and single-spot Aethalometers: equivalent black carbon, light absorption, Ångström exponent and secondary brown carbon estimations**

**Liangbin Wu et al.**

*Correspondence to:* Cheng Wu ([wucheng.vip@foxmail.com](mailto:wucheng.vip@foxmail.com))

The copyright of individual parts of the supplement might differ from the article licence.

## Test S1 AAE calculation examples

Following are the data points used as an example.

|                       |                        |                       |                       |                       |                       |                       |
|-----------------------|------------------------|-----------------------|-----------------------|-----------------------|-----------------------|-----------------------|
| babs370               | babs470                | babs520               | babs590               | babs660               | babs880               | babs950               |
| 41.98                 | 32.19                  | 27.40                 | 24.04                 | 20.45                 | 14.27                 | 13.52                 |
| $\ln(\text{babs370})$ | $\ln(\text{babs 470})$ | $\ln(\text{babs520})$ | $\ln(\text{babs590})$ | $\ln(\text{babs660})$ | $\ln(\text{babs880})$ | $\ln(\text{babs950})$ |
| 3.74                  | 3.47                   | 3.31                  | 3.18                  | 3.02                  | 2.66                  | 2.60                  |
| $\lambda_1$           | $\lambda_2$            | $\lambda_3$           | $\lambda_4$           | $\lambda_5$           | $\lambda_6$           | $\lambda_7$           |
| 370                   | 470                    | 520                   | 590                   | 660                   | 880                   | 950                   |
| $\ln 370$             | $\ln 470$              | $\ln 520$             | $\ln 590$             | $\ln 660$             | $\ln 880$             | $\ln 950$             |
| 5.91                  | 6.15                   | 6.25                  | 6.38                  | 6.49                  | 6.78                  | 6.86                  |

Example of approach 1:

$$AAE_{370/950} = \frac{\ln(b_{abs950}/b_{abs370})}{\ln(370/950)}$$

$$AAE_{370/950} = \ln(13.52/41.98)/\ln(370/950) = 1.20$$

Example of approach 2:

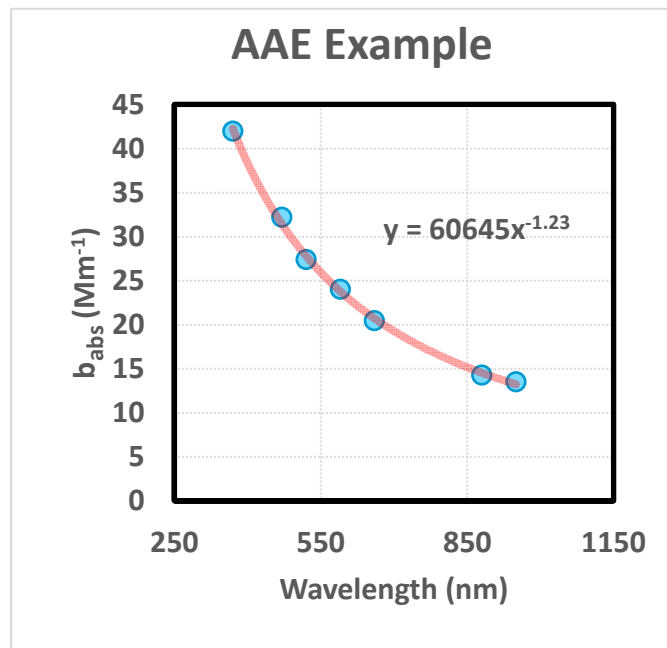

AAE wave obtained from the curve fitting of the power function. In this case,  $AAE_{370-950} = 1.23$

**Table S1.** The  $\sigma_{air}$  of AE33 Aethalometer and  $\sigma_{ATN}$  of AE31 Aethalometer. The relationship between  $\sigma_{air}$  and  $\sigma_{ATN}$  can be written as  $\sigma_{ATN} = C_0 \cdot \sigma_{air}$ . The  $\sigma_{air}$  was derived from the historical  $\sigma_{ATN}$  using  $C_0 = 2.14$  (Drinovec et al., 2015).

| Wavelength | AE33_ $\sigma_{air}$ ( $m^2g^{-1}$ ) | AE31_ $\sigma_{ATN}$ ( $m^2g^{-1}$ ) |
|------------|--------------------------------------|--------------------------------------|
| 370 nm     | 18.47                                | 39.5                                 |
| 470 nm     | 14.54                                | 31.1                                 |
| 520 nm     | 13.14                                | 28.1                                 |
| 590 nm     | 11.58                                | 24.8                                 |
| 660 nm     | 10.35                                | 22.2                                 |
| 880 nm     | 7.77                                 | 16.6                                 |
| 950 nm     | 7.19                                 | 15.4                                 |

**Table S2.** Summary of the multiple scattering parameter ( $C_{ref}$ ) values for Aethamometers reported in the literature.

| Reference                   | Site                  | Site type                        | Aethalometer (Filter type)                | Reference instrument        | Wavelength (nm) |      |      |           |                                                   |      |      |
|-----------------------------|-----------------------|----------------------------------|-------------------------------------------|-----------------------------|-----------------|------|------|-----------|---------------------------------------------------|------|------|
|                             |                       |                                  |                                           |                             | 370             | 470  | 520  | 590       | 660                                               | 880  | 950  |
| (Bernardoni et al., 2021)   | Milan (Italy)         | Urban background station         | AE33 (TFE-coated glass fibre tape T60A20) | PP_UniMI                    |                 | 2.91 | 2.93 |           | 2.78                                              | 2.78 |      |
|                             |                       |                                  | AE31 (Pall Q250 quartz)                   |                             |                 | 3.58 | 3.54 |           | 3.56                                              | 3.47 |      |
| (Valentini et al., 2020)    | Rome (Italy)          | Urban background station         | AE33                                      | MAAP                        |                 |      |      |           | 2.66                                              |      |      |
| (Zhao et al., 2020)         | Beijing (China)       | Urban                            | AE33 (Tape 8060)                          | PASS-3                      |                 |      |      | 2.9 ± 0.4 |                                                   |      |      |
| (Backman et al., 2017)      | Arctic                | Clean environment                | AE31 (Pallflex Q250F)                     | PSAP/MAAP                   |                 |      |      | 3.45      |                                                   |      |      |
| (Di Biagio et al., 2017)    | Laboratory            | Mineral dust aerosols            | AE31                                      | Extinction minus scattering |                 |      |      |           | 1.92                                              |      |      |
| (Segura et al., 2014)       | Granada (Spain)       | Urban                            | AE31                                      | MAAP                        | 3.42            | 3.87 | 3.90 | 3.98      | 4.19                                              | 4.35 | 4.59 |
| (Arnott et al., 2005)       | Las Vegas (USA)       | Urban                            | AE31                                      | PAS                         |                 |      | 3.69 |           |                                                   |      |      |
| (Collaud Coen et al., 2010) | Cabauw, (Netherlands) | Urban                            | AE31 (Pallflex Q250F)                     | MAAP                        |                 |      |      |           | 4.26                                              |      |      |
| (Zhang et al., 2021)        | Beijing (China)       | Urban                            | AE31                                      | PAS                         | 5.61            | 4.98 | 4.73 | 4.92      | 5.19                                              | 5.30 | 5.24 |
| (Weingartner et al., 2003)  | Laboratory            | Diesel soot with organic coating | AE30 (Pallflex Q250F)                     | Extinction minus scattering |                 |      |      |           | 3.60                                              |      |      |
| (Schmid et al., 2006)       | Amazon (Brazil)       | Biomass aerosol                  | AE30                                      | PAS                         |                 |      | 5.23 |           |                                                   |      |      |
| (Saturno et al., 2017)      | Amazon (Brazil)       | Urban                            | AE31                                      | MAPP                        |                 |      |      |           | 4.90                                              |      |      |
| (Lim et al., 2018)          | East Asia             | Urban                            | AE31                                      | PASS-3                      | 3.37            | 3.80 | 3.99 | 4.25      | 4.49                                              | 5.18 | 5.39 |
| (Ajtai et al., 2019)        | Budapest (Hungary)    | Urban                            | AE42 (Quartz)                             | PAS                         | 2.15            | 3.52 | 4.78 | 4.86      | 5.21                                              | 5.11 | 5.16 |
| (Laing et al., 2020)        | Oregon (USA)          | Rural                            | AE33 (TFE-coated glass filter)            | TAP                         |                 | 4.35 | 4.45 |           | 4.24                                              |      |      |
| (Qin et al., 2018)          | Guangzhou (China)     | Suburban                         | AE33 (TFE-coated glass filter)            | Extinction minus scattering |                 |      |      |           | $C_{AE33} = C_0 \cdot H = 1.57 \cdot 2.1 = 3.297$ |      |      |
| (Wu et al., 2013)           | Guangzhou (China)     | Suburban                         | AE16                                      | PAS                         |                 |      |      | 3.48      |                                                   |      |      |

**Table S3.** The monthly eBC mass concentrations ( $\mu\text{g m}^{-3}$ ) of AE31 and AE33 Aethalometers at 5 min and 1 hr time bases. AE31\_V and AE31\_W are AE31 data corrected by algorithms of Virkkula and Weingartner, respectively. AE33<sub>2nd\_Cor</sub> refers to eBC of AE33 with the second correction.

| Time base | Instrument/ Algorithm   | Annual    | Apr-2021  | May-2021  | Jun-2021  | Jul-2021  | Aug-2021  | Sep-2021  | Oct-2021  | Nov-2021  | Dec-2021  | Jan-2022  | Feb-2022  | Mar-2022  |
|-----------|-------------------------|-----------|-----------|-----------|-----------|-----------|-----------|-----------|-----------|-----------|-----------|-----------|-----------|-----------|
| 1 hr      | AE31_V                  | 1.95±1.12 | 2.44±1.14 | 1.75±0.91 | 1.89±0.86 | 1.66±0.80 | 1.98±0.90 | 2.26±1.06 | 1.39±0.83 | 1.71±0.92 | 2.05±1.16 | 2.63±1.53 | 1.18±0.90 | 2.38±1.24 |
|           | AE31_W                  | 1.95±1.12 | 2.44±1.15 | 1.75±0.91 | 1.89±0.86 | 1.66±0.81 | 1.98±0.90 | 2.26±1.07 | 1.38±0.84 | 1.70±0.92 | 2.04±1.16 | 2.62±1.50 | 1.17±0.90 | 2.38±1.24 |
|           | AE33                    | 2.35±1.37 | 2.76±1.29 | 2.06±1.05 | 2.22±1.05 | 1.91±0.85 | 2.36±1.10 | 2.65±1.24 | 1.81±1.16 | 2.21±1.26 | 2.51±1.39 | 3.25±1.86 | 1.46±1.16 | 2.91±1.65 |
|           | AE33 <sub>2nd_Cor</sub> | 1.96±1.14 | 2.30±1.08 | 1.71±0.87 | 1.85±0.87 | 1.59±0.71 | 1.97±0.92 | 2.21±1.04 | 1.51±0.97 | 1.84±1.05 | 2.09±1.16 | 2.71±1.55 | 1.22±0.97 | 2.43±1.38 |
| 5 min     | AE31_V                  | 1.96±1.18 | 2.45±1.21 | 1.75±0.95 | 1.89±0.93 | 1.66±0.85 | 1.97±0.95 | 2.25±1.10 | 1.39±0.84 | 1.71±0.93 | 2.05±1.23 | 2.63±1.62 | 1.18±0.95 | 2.42±1.31 |
|           | AE31_W                  | 1.96±1.18 | 2.46±1.22 | 1.75±0.96 | 1.89±0.94 | 1.66±0.85 | 1.98±0.95 | 2.25±1.12 | 1.39±0.85 | 1.71±0.94 | 2.05±1.23 | 2.62±1.62 | 1.17±0.96 | 2.41±1.31 |
|           | AE33                    | 2.35±1.39 | 2.78±1.37 | 2.05±1.07 | 2.22±1.09 | 1.91±0.89 | 2.36±1.13 | 2.64±1.27 | 1.79±1.14 | 2.18±1.19 | 2.52±1.43 | 3.25±1.87 | 1.46±1.16 | 2.91±1.66 |
|           | AE33 <sub>2nd_Cor</sub> | 2.02±1.20 | 2.36±1.16 | 1.74±0.90 | 1.88±0.92 | 1.61±0.75 | 2.00±0.96 | 2.24±1.08 | 1.52±0.97 | 1.85±1.00 | 2.13±1.21 | 2.80±1.61 | 1.26±1.00 | 2.51±1.43 |

**Table S4.** Annual mean  $b_{abs}$  ( $\pm 1$  S.D.) by AE31\_V, AE31\_W and AE33 at 7 wavelengths.

| Model  | Time base | Annual mean $b_{abs}$ with $\pm 1$ S.D. ( $Mm^{-1}$ ) |                   |                  |                  |                  |                 |                 |
|--------|-----------|-------------------------------------------------------|-------------------|------------------|------------------|------------------|-----------------|-----------------|
|        |           | 370 nm                                                | 470 nm            | 520 nm           | 590 nm           | 660 nm           | 880 nm          | 950 nm          |
| AE31_V | 1 hr      | 22.10 $\pm$ 12.78                                     | 16.94 $\pm$ 9.84  | 14.72 $\pm$ 8.58 | 13.12 $\pm$ 7.70 | 11.75 $\pm$ 6.94 | 8.69 $\pm$ 5.20 | 7.69 $\pm$ 4.63 |
|        | 5 min     | 22.16 $\pm$ 13.03                                     | 16.98 $\pm$ 10.55 | 14.76 $\pm$ 8.78 | 13.15 $\pm$ 7.90 | 11.78 $\pm$ 7.15 | 7.81 $\pm$ 5.42 | 7.71 $\pm$ 4.86 |
| AE31_W | 1 hr      | 20.62 $\pm$ 11.97                                     | 16.36 $\pm$ 9.51  | 14.47 $\pm$ 8.44 | 12.97 $\pm$ 7.63 | 11.49 $\pm$ 6.80 | 8.62 $\pm$ 5.19 | 7.51 $\pm$ 4.55 |
|        | 5 min     | 20.70 $\pm$ 12.22                                     | 16.42 $\pm$ 9.73  | 14.52 $\pm$ 8.65 | 13.02 $\pm$ 7.84 | 11.53 $\pm$ 7.01 | 8.65 $\pm$ 5.41 | 7.54 $\pm$ 4.79 |
| AE33   | 1 hr      | 21.05 $\pm$ 12.48                                     | 16.33 $\pm$ 9.59  | 14.05 $\pm$ 7.90 | 12.21 $\pm$ 7.19 | 10.42 $\pm$ 6.15 | 7.51 $\pm$ 4.48 | 7.14 $\pm$ 4.27 |
|        | 5 min     | 21.04 $\pm$ 12.64                                     | 16.32 $\pm$ 9.70  | 14.02 $\pm$ 8.10 | 12.20 $\pm$ 7.27 | 10.41 $\pm$ 6.23 | 7.50 $\pm$ 4.54 | 7.14 $\pm$ 4.32 |

**Table S5.** Monthly  $b_{abs}$  comparisons (370 nm) among  $AE33_{b_{abs}}$ ,  $AE31_V_{b_{abs}}$ , and  $AE31_W_{b_{abs}}$  at 5 min and 1 hr time bases. Where the  $AE31_V_{b_{abs}}$  and  $AE31_W_{b_{abs}}$  are the light absorption coefficients of AE31 corrected by the procedures of Virkkula and Weingartner, respectively. And the  $AE33_{b_{abs}}$  is the light absorption coefficient of the AE33 aethalometer.

| 370 nm                                         | Time base |                | Annual | Apr-2021 | May-2021 | Jun-2021 | Jul-2021 | Aug-2021 | Sep-2021 | Oct-2021 | Nov-2021 | Dec-2021 | Jan-2022 | Feb-2022 | Mar-2022 |
|------------------------------------------------|-----------|----------------|--------|----------|----------|----------|----------|----------|----------|----------|----------|----------|----------|----------|----------|
| $AE33_{b_{abs}}$<br>vs<br>$AE31_V_{b_{abs}}$   | 5 min     | R <sup>2</sup> | 0.95   | 0.96     | 0.97     | 0.95     | 0.93     | 0.95     | 0.94     | 0.93     | 0.93     | 0.97     | 0.93     | 0.94     | 0.91     |
|                                                |           | Slope          | 0.96   | 0.89     | 0.91     | 0.92     | 0.85     | 0.95     | 0.97     | 0.98     | 1.03     | 0.98     | 0.97     | 0.98     | 1.00     |
|                                                | 1 hr      | R <sup>2</sup> | 0.96   | 0.96     | 0.98     | 0.98     | 0.97     | 0.96     | 0.96     | 0.97     | 0.96     | 0.98     | 0.97     | 0.97     | 0.96     |
|                                                |           | Slope          | 0.97   | 0.89     | 0.93     | 0.93     | 0.89     | 0.96     | 0.99     | 1.06     | 1.09     | 0.99     | 0.98     | 0.97     | 1.08     |
| $AE33_{b_{abs}}$<br>vs<br>$AE31_W_{b_{abs}}$   | 5 min     | R <sup>2</sup> | 0.94   | 0.95     | 0.96     | 0.94     | 0.93     | 0.94     | 0.93     | 0.93     | 0.91     | 0.96     | 0.91     | 0.94     | 0.89     |
|                                                |           | Slope          | 1.03   | 0.95     | 0.97     | 1.00     | 0.90     | 1.02     | 1.04     | 1.05     | 1.10     | 1.05     | 1.04     | 1.04     | 1.07     |
|                                                | 1 hr      | R <sup>2</sup> | 0.95   | 0.95     | 0.97     | 0.97     | 0.96     | 0.95     | 0.95     | 0.96     | 0.95     | 0.97     | 0.96     | 0.96     | 0.95     |
|                                                |           | Slope          | 1.04   | 0.96     | 0.99     | 1.01     | 0.95     | 1.03     | 1.05     | 1.14     | 1.16     | 1.05     | 1.06     | 1.04     | 1.15     |
| $AE31_W_{b_{abs}}$<br>vs<br>$AE31_V_{b_{abs}}$ | 5 min     | R <sup>2</sup> | 0.99   | 0.99     | 0.99     | 0.99     | 0.99     | 0.99     | 0.99     | 0.99     | 0.99     | 0.99     | 0.99     | 0.99     | 0.99     |
|                                                |           | Slope          | 0.93   | 0.94     | 0.94     | 0.92     | 0.94     | 0.93     | 0.94     | 0.93     | 0.94     | 0.94     | 0.94     | 0.93     | 0.94     |
|                                                | 1 hr      | R <sup>2</sup> | 0.99   | 0.99     | 0.99     | 0.99     | 0.99     | 0.99     | 0.99     | 0.99     | 0.99     | 0.99     | 0.99     | 0.99     | 0.99     |
|                                                |           | Slope          | 0.93   | 0.93     | 0.94     | 0.92     | 0.94     | 0.93     | 0.94     | 0.93     | 0.94     | 0.94     | 0.94     | 0.93     | 0.93     |

**Table S6.** Monthly  $b_{obs}$  comparisons (880 nm) among  $AE33_{b_{obs}}$ ,  $AE31_V_{b_{obs}}$ , and  $AE31_W_{b_{obs}}$  at 5 min and 1 hr time bases. Where the  $AE31_V_{b_{obs}}$  and  $AE31_W_{b_{obs}}$  are the light absorption coefficients of AE31 corrected by the procedures of Virkkula and Weingartner, respectively. And the  $AE33_{b_{obs}}$  is the light absorption coefficient of the AE33 aethalometer.

| 880 nm                   | Time base |                | Annual | Apr-2021 | May-2021 | Jun-2021 | Jul-2021 | Aug-2021 | Sep-2021 | Oct-2021 | Nov-2021 | Dec-2021 | Jan-2022 | Feb-2022 | Mar-2022 |
|--------------------------|-----------|----------------|--------|----------|----------|----------|----------|----------|----------|----------|----------|----------|----------|----------|----------|
|                          |           |                |        |          |          |          |          |          |          |          |          |          |          |          |          |
| $AE33_{b_{obs}}$         | 5 min     | R <sup>2</sup> | 0.91   | 0.94     | 0.90     | 0.88     | 0.89     | 0.91     | 0.92     | 0.93     | 0.86     | 0.92     | 0.84     | 0.87     | 0.84     |
|                          |           | Slope          | 0.85   | 0.77     | 0.72     | 0.74     | 0.74     | 0.80     | 0.80     | 0.88     | 0.91     | 0.83     | 0.84     | 0.86     | 0.86     |
| vs<br>$AE31_V_{b_{obs}}$ | 1 hr      | R <sup>2</sup> | 0.97   | 0.97     | 0.97     | 0.97     | 0.96     | 0.97     | 0.96     | 0.97     | 0.96     | 0.98     | 0.98     | 0.98     | 0.97     |
|                          |           | Slope          | 0.87   | 0.81     | 0.85     | 0.86     | 0.79     | 0.88     | 0.85     | 0.95     | 0.96     | 0.87     | 0.89     | 0.87     | 0.99     |
| $AE33_{b_{obs}}$         | 5 min     | R <sup>2</sup> | 0.91   | 0.93     | 0.89     | 0.86     | 0.88     | 0.90     | 0.90     | 0.92     | 0.86     | 0.92     | 0.84     | 0.87     | 0.84     |
|                          |           | Slope          | 0.86   | 0.77     | 0.72     | 0.75     | 0.75     | 0.80     | 0.80     | 0.89     | 0.92     | 0.83     | 0.85     | 0.87     | 0.87     |
| vs<br>$AE31_W_{b_{obs}}$ | 1 hr      | R <sup>2</sup> | 0.96   | 0.96     | 0.96     | 0.96     | 0.94     | 0.96     | 0.95     | 0.96     | 0.95     | 0.98     | 0.98     | 0.97     | 0.97     |
|                          |           | Slope          | 0.95   | 0.81     | 0.85     | 0.86     | 0.80     | 0.88     | 0.85     | 0.96     | 0.97     | 0.88     | 0.91     | 0.88     | 1.01     |
| $AE31_W_{b_{obs}}$       | 5 min     | R <sup>2</sup> | 0.99   | 0.99     | 0.99     | 0.99     | 0.99     | 0.99     | 0.99     | 0.99     | 0.99     | 0.99     | 0.99     | 1.00     | 0.99     |
|                          |           | Slope          | 0.99   | 1.00     | 0.99     | 0.99     | 0.99     | 1.00     | 1.00     | 0.99     | 0.99     | 0.99     | 0.99     | 0.98     | 0.99     |
| vs<br>$AE31_V_{b_{obs}}$ | 1 hr      | R <sup>2</sup> | 1.00   | 0.99     | 0.99     | 0.99     | 0.99     | 0.99     | 0.99     | 0.99     | 0.99     | 0.99     | 0.99     | 1.00     | 0.99     |
|                          |           | Slope          | 0.98   | 1.00     | 1.00     | 1.00     | 0.99     | 1.00     | 1.00     | 0.98     | 0.99     | 0.99     | 0.99     | 1.00     | 0.99     |



**Table S7.** The relative deviation of slope between monthly and annual data among AE33\_*b<sub>abs</sub>*, AE31\_V\_*b<sub>abs</sub>*, and AE31\_W\_*b<sub>abs</sub>* at 5 min and 1 hr time bases. The month with the maximum deviation was shown in bold. Where the AE31\_V\_*b<sub>abs</sub>* and AE31\_W\_*b<sub>abs</sub>* are the light absorption coefficients of AE31 corrected by the procedures of Virkkula and Weingartner, respectively. And the AE33\_*b<sub>abs</sub>* is the light absorption coefficient of the AE33 aethalometer.

| Relative deviation of slope | Instrument/ Algorithm                                            | Time base | Apr-2021 | May-2021      | Jun-2021      | Jul-2021      | Aug-2021 | Sep-2021 | Oct-2021 | Nov-2021      | Dec-2021 | Jan-2022 | Feb-2022 | Mar-2022      |
|-----------------------------|------------------------------------------------------------------|-----------|----------|---------------|---------------|---------------|----------|----------|----------|---------------|----------|----------|----------|---------------|
| 370 nm                      | AE33_ <i>b<sub>abs</sub></i> vs AE31_V_ <i>b<sub>abs</sub></i>   | 5 min     | 7.29%    | 5.21%         | 4.17%         | <b>11.46%</b> | 1.04%    | 1.04%    | 2.08%    | 7.29%         | 2.08%    | 1.04%    | 2.08%    | 4.17%         |
|                             | AE33_ <i>b<sub>abs</sub></i> vs AE31_V_ <i>b<sub>abs</sub></i>   | 1 hr      | 8.25%    | 4.12%         | 4.12%         | 8.25%         | 1.03%    | 2.06%    | 9.28%    | <b>12.37%</b> | 2.06%    | 1.03%    | 0.00%    | 11.34%        |
|                             | AE33_ <i>b<sub>abs</sub></i> vs AE31_W_ <i>b<sub>abs</sub></i>   | 5 min     | 7.77%    | 5.83%         | 2.91%         | <b>12.62%</b> | 0.97%    | 0.97%    | 1.94%    | 6.80%         | 1.94%    | 0.97%    | 0.97%    | 3.88%         |
|                             | AE33_ <i>b<sub>abs</sub></i> vs AE31_W_ <i>b<sub>abs</sub></i>   | 1 hr      | 7.69%    | 4.81%         | 2.88%         | 8.65%         | 0.96%    | 0.96%    | 9.62%    | <b>11.54%</b> | 0.96%    | 1.92%    | 0.00%    | 10.58%        |
|                             | AE31_W_ <i>b<sub>abs</sub></i> vs AE31_V_ <i>b<sub>abs</sub></i> | 5 min     | 1.08%    | 1.08%         | 1.08%         | 1.08%         | 0.00%    | 1.08%    | 0.00%    | 1.08%         | 1.08%    | 0.00%    | 1.08%    | 1.08%         |
|                             | AE31_W_ <i>b<sub>abs</sub></i> vs AE31_V_ <i>b<sub>abs</sub></i> | 1 hr      | 0.00%    | 1.08%         | 1.08%         | 1.08%         | 0.00%    | 1.08%    | 0.00%    | 1.08%         | 1.08%    | 0.00%    | 0.00%    | 1.08%         |
| 880 nm                      | AE33_ <i>b<sub>abs</sub></i> vs AE31_V_ <i>b<sub>abs</sub></i>   | 5 min     | 9.41%    | 15.29%        | <b>12.94%</b> | <b>12.94%</b> | 5.88%    | 5.88%    | 3.53%    | 7.06%         | 2.35%    | 1.18%    | 1.18%    | 1.18%         |
|                             | AE33_ <i>b<sub>abs</sub></i> vs AE31_V_ <i>b<sub>abs</sub></i>   | 1 hr      | 6.90%    | 2.30%         | 1.15%         | 9.20%         | 1.15%    | 2.30%    | 9.20%    | 10.34%        | 0.00%    | 2.30%    | 0.00%    | <b>13.79%</b> |
|                             | AE33_ <i>b<sub>abs</sub></i> vs AE31_W_ <i>b<sub>abs</sub></i>   | 5 min     | 10.47%   | <b>16.28%</b> | 12.79%        | 12.79%        | 6.98%    | 6.98%    | 3.49%    | 6.98%         | 3.49%    | 1.16%    | 1.16%    | 1.16%         |
|                             | AE33_ <i>b<sub>abs</sub></i> vs AE31_W_ <i>b<sub>abs</sub></i>   | 1 hr      | 6.90%    | 2.30%         | 1.15%         | 8.05%         | 1.15%    | 2.30%    | 10.34%   | 11.49%        | 1.15%    | 4.60%    | 1.15%    | <b>16.09%</b> |
|                             | AE31_W_ <i>b<sub>abs</sub></i> vs AE31_V_ <i>b<sub>abs</sub></i> | 5 min     | 1.01%    | 0.00%         | 0.00%         | 0.00%         | 1.01%    | 1.01%    | 0.00%    | 0.00%         | 0.00%    | 0.00%    | 1.01%    | 0.00%         |
|                             | AE31_W_ <i>b<sub>abs</sub></i> vs AE31_V_ <i>b<sub>abs</sub></i> | 1 hr      | 1.01%    | 1.01%         | 1.01%         | 0.00%         | 1.01%    | 1.01%    | 1.01%    | 0.00%         | 0.00%    | 0.00%    | 1.01%    | 0.00%         |

**Table S8.** Sensitivity test of C value on the comparison of AE33 vs. AE31. The value of  $C_{AE33}$  was varied from 2.419 to 3.319 with an interval of 0.1 while  $C_{AE31}$  was set to a constant (3.48) during the sensitivity test.

| $C_{AE33}$ | AE33/AE31 slope |        |        |        |        |        |        | Average |
|------------|-----------------|--------|--------|--------|--------|--------|--------|---------|
|            | 370 nm          | 470 nm | 520 nm | 590 nm | 660 nm | 880 nm | 950 nm |         |
| 2.419      | 1.17            | 1.17   | 1.05   | 1.13   | 1.08   | 1.04   | 1.13   | 1.11    |
| 2.519      | 1.12            | 1.13   | 1.01   | 1.09   | 1.03   | 1.00   | 1.08   | 1.07    |
| 2.619      | 1.08            | 1.08   | 0.97   | 1.04   | 0.99   | 0.96   | 1.04   | 1.02    |
| 2.719      | 1.04            | 1.04   | 0.93   | 1.01   | 0.96   | 0.93   | 1.00   | 0.99    |
| 2.819      | 1.00            | 1.01   | 0.90   | 0.97   | 0.92   | 0.90   | 0.97   | 0.95    |
| 2.919      | 0.97            | 0.97   | 0.87   | 0.94   | 0.89   | 0.87   | 0.93   | 0.92    |
| 3.019      | 0.93            | 0.94   | 0.84   | 0.91   | 0.86   | 0.84   | 0.90   | 0.89    |
| 3.119      | 0.90            | 0.91   | 0.81   | 0.88   | 0.84   | 0.81   | 0.87   | 0.86    |
| 3.219      | 0.88            | 0.88   | 0.79   | 0.85   | 0.81   | 0.79   | 0.85   | 0.84    |
| 3.319      | 0.85            | 0.85   | 0.76   | 0.82   | 0.78   | 0.76   | 0.82   | 0.81    |

**Table S9.** Monthly average ( $\pm 1$  S.D.) of AAE values (AAE<sub>470/660</sub>, AAE<sub>370/880</sub>, AAE<sub>880/950</sub>, AAE<sub>370/950</sub> and AAE<sub>370-950</sub>) calculated by 1 hr data.

| AAE     | Apr-2021 | May-2021  | Jun-2021  | Jul-2021  | Aug-2021  | Sep-2021  | Oct-2021  | Nov-2021  | Dec-2021  | Jan-2022  | Feb-2022  | Mar-2022  | Annual    |           |
|---------|----------|-----------|-----------|-----------|-----------|-----------|-----------|-----------|-----------|-----------|-----------|-----------|-----------|-----------|
| 470/660 | AE31_V   | 1.04±0.09 | 1.03±0.08 | 1.04±0.08 | 1.03±0.08 | 1.03±0.08 | 1.01±0.08 | 1.09±0.14 | 1.20±0.18 | 1.22±0.11 | 1.23±0.09 | 1.30±0.18 | 1.17±0.11 | 1.12±0.15 |
|         | AE31_W   | 1.00±0.13 | 1.00±0.12 | 1.00±0.13 | 1.00±0.13 | 0.99±0.12 | 0.98±0.12 | 1.06±0.17 | 1.17±0.19 | 1.18±0.14 | 1.19±0.12 | 1.28±0.19 | 1.13±0.14 | 1.08±0.17 |
|         | AE33     | 1.28±0.08 | 1.25±0.05 | 1.27±0.07 | 1.28±0.06 | 1.27±0.06 | 1.27±0.06 | 1.33±0.09 | 1.40±0.12 | 1.43±0.09 | 1.45±0.09 | 1.46±0.14 | 1.34±0.14 | 1.33±0.12 |
| 370/880 | AE31_V   | 1.04±0.15 | 1.03±0.26 | 1.03±0.23 | 1.03±0.17 | 1.02±0.20 | 1.01±0.15 | 1.09±0.24 | 1.21±0.29 | 1.23±0.20 | 1.25±0.22 | 1.28±0.27 | 1.16±0.23 | 1.11±0.14 |
|         | AE31_W   | 0.97±0.18 | 0.96±0.28 | 0.96±0.25 | 0.96±0.20 | 0.95±0.22 | 0.94±0.18 | 1.02±0.26 | 1.15±0.31 | 1.16±0.22 | 1.18±0.23 | 1.23±0.28 | 1.09±0.25 | 1.05±0.17 |
|         | AE33     | 1.12±0.11 | 1.11±0.06 | 1.12±0.08 | 1.14±0.07 | 1.12±0.07 | 1.13±0.07 | 1.21±0.10 | 1.27±0.12 | 1.31±0.09 | 1.32±0.10 | 1.30±0.20 | 1.21±0.15 | 1.20±0.13 |
| 880/950 | AE31_V   | 1.59±0.32 | 1.72±0.41 | 1.74±0.39 | 1.65±0.34 | 1.69±0.38 | 1.67±0.38 | 1.85±0.49 | 1.74±0.56 | 1.77±0.38 | 1.98±0.57 | 1.82±0.61 | 1.78±0.57 | 1.75±0.47 |
|         | AE31_W   | 1.78±0.31 | 1.91±0.40 | 1.94±0.38 | 1.84±0.34 | 1.89±0.37 | 1.86±0.37 | 2.04±0.49 | 1.92±0.52 | 1.95±0.38 | 2.17±0.57 | 1.99±0.60 | 1.96±0.57 | 1.94±0.46 |
|         | AE33     | 0.66±0.06 | 0.62±0.06 | 0.62±0.06 | 0.62±0.06 | 0.60±0.05 | 0.62±0.06 | 0.65±0.09 | 0.69±0.10 | 0.72±0.07 | 0.76±0.11 | 0.76±0.28 | 0.67±0.13 | 0.67±0.12 |
| 370/950 | AE31_V   | 1.05±0.07 | 1.02±0.06 | 1.03±0.07 | 1.04±0.06 | 1.03±0.06 | 1.03±0.06 | 1.10±0.09 | 1.18±0.14 | 1.22±0.10 | 1.23±0.09 | 1.26±0.11 | 1.14±0.10 | 1.16±0.14 |
|         | AE31_W   | 1.01±0.11 | 0.98±0.10 | 0.99±0.11 | 1.00±0.11 | 0.98±0.10 | 0.98±0.11 | 1.06±0.13 | 1.15±0.16 | 1.18±0.13 | 1.19±0.11 | 1.23±0.14 | 1.09±0.13 | 1.12±0.17 |
|         | AE33     | 1.12±0.08 | 1.10±0.05 | 1.11±0.06 | 1.12±0.06 | 1.11±0.05 | 1.12±0.06 | 1.20±0.09 | 1.25±0.10 | 1.29±0.08 | 1.32±0.09 | 1.35±0.14 | 1.20±0.13 | 1.15±0.12 |
| 370-950 | AE31_V   | 1.06±0.16 | 1.06±0.29 | 1.06±0.28 | 1.05±0.19 | 1.05±0.23 | 1.04±0.18 | 1.12±0.26 | 1.22±0.31 | 1.24±0.22 | 1.28±0.29 | 1.30±0.26 | 1.19±0.26 | 1.11±0.12 |
|         | AE31_W   | 1.02±0.19 | 1.02±0.31 | 1.02±0.29 | 1.01±0.21 | 1.01±0.25 | 1.00±0.20 | 1.08±0.27 | 1.18±0.32 | 1.20±0.23 | 1.24±0.30 | 1.27±0.27 | 1.14±0.27 | 1.07±0.15 |
|         | AE33     | 1.12±0.08 | 1.10±0.05 | 1.11±0.06 | 1.12±0.06 | 1.11±0.06 | 1.12±0.06 | 1.19±0.10 | 1.25±0.11 | 1.29±0.09 | 1.31±0.10 | 1.35±0.17 | 1.20±0.15 | 1.19±0.12 |

**Table S10.** Secondary brown carbon light absorption of AE31 and AE33 aethalometers at hourly time resolution.

| $b_{abs370\_BrCsec} (Mm^{-1})$ | AE31_V      | AE31_W      | AE33        |
|--------------------------------|-------------|-------------|-------------|
| Full-year                      | 2.16 ± 2.02 | 2.61 ± 2.35 | 1.99 ± 1.97 |
| Dry season                     | 2.68 ± 2.15 | 2.91 ± 2.54 | 2.34 ± 2.08 |
| Wet season                     | 1.12 ± 1.15 | 2.07 ± 1.85 | 0.99 ± 1.15 |
| Apr-2021                       | 1.85 ± 1.51 | 2.80 ± 2.42 | 1.55 ± 1.65 |
| May-2021                       | 0.71 ± 0.62 | 1.58 ± 1.41 | 0.43 ± 0.44 |
| Jun-2021                       | 0.96 ± 1.14 | 1.89 ± 1.72 | 0.82 ± 1.03 |
| Jul-2021                       | 0.98 ± 1.07 | 1.87 ± 1.63 | 0.87 ± 0.91 |
| Aug-2021                       | 0.92 ± 0.87 | 2.05 ± 1.73 | 0.86 ± 0.79 |
| Sep-2021                       | 1.08 ± 0.99 | 2.11 ± 1.71 | 1.05 ± 1.06 |
| Oct-2021                       | 1.44 ± 1.58 | 1.94 ± 1.80 | 1.58 ± 1.82 |
| Nov-2021                       | 3.46 ± 2.39 | 3.66 ± 2.90 | 2.95 ± 2.37 |
| Dec-2021                       | 4.22 ± 2.40 | 4.51 ± 3.06 | 3.38 ± 2.38 |
| Jan-2022                       | 3.02 ± 1.78 | 3.08 ± 2.19 | 2.38 ± 1.77 |
| Feb-2022                       | 1.64 ± 1.28 | 1.67 ± 1.40 | 1.45 ± 1.32 |
| Mar-2022                       | 1.92 ± 1.56 | 2.27 ± 2.01 | 1.75 ± 1.62 |

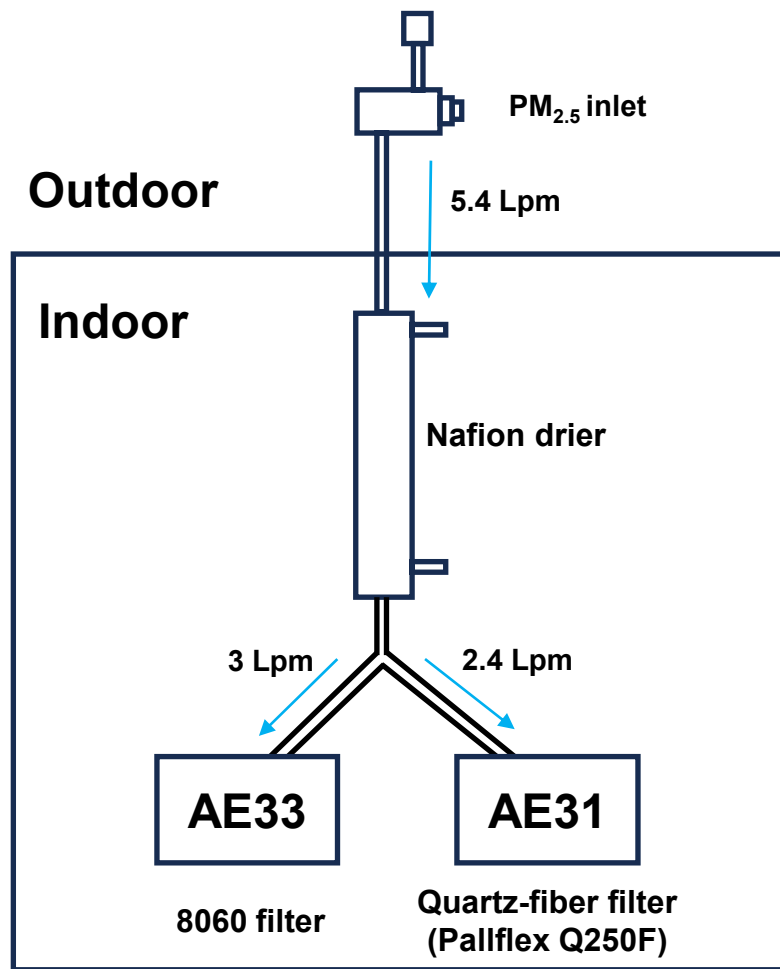

**Figure S1.** Tubing connection diagram of AE33 and AE31.

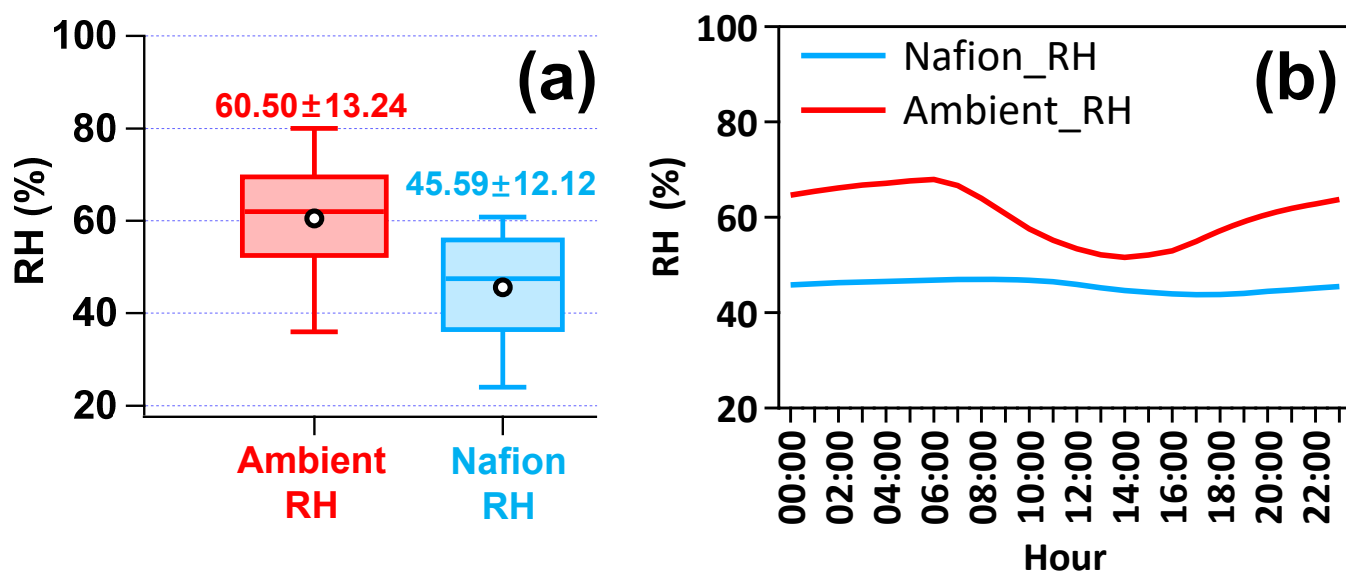

**Figure S2.** Ambient and dried sample RH (Nafion) characteristics during the one-year campaign. (a) Box plot of annual average RH. Black circles represent annual average concentrations. The line inside the box indicates the annual median concentration. The upper and lower boundaries of the box represent the 75<sup>th</sup> and the 25<sup>th</sup> percentile; the whisker above and below each box represents the 95<sup>th</sup> and 5<sup>th</sup> percentile. (b) Diurnal variations of ambient and Nafion RH.

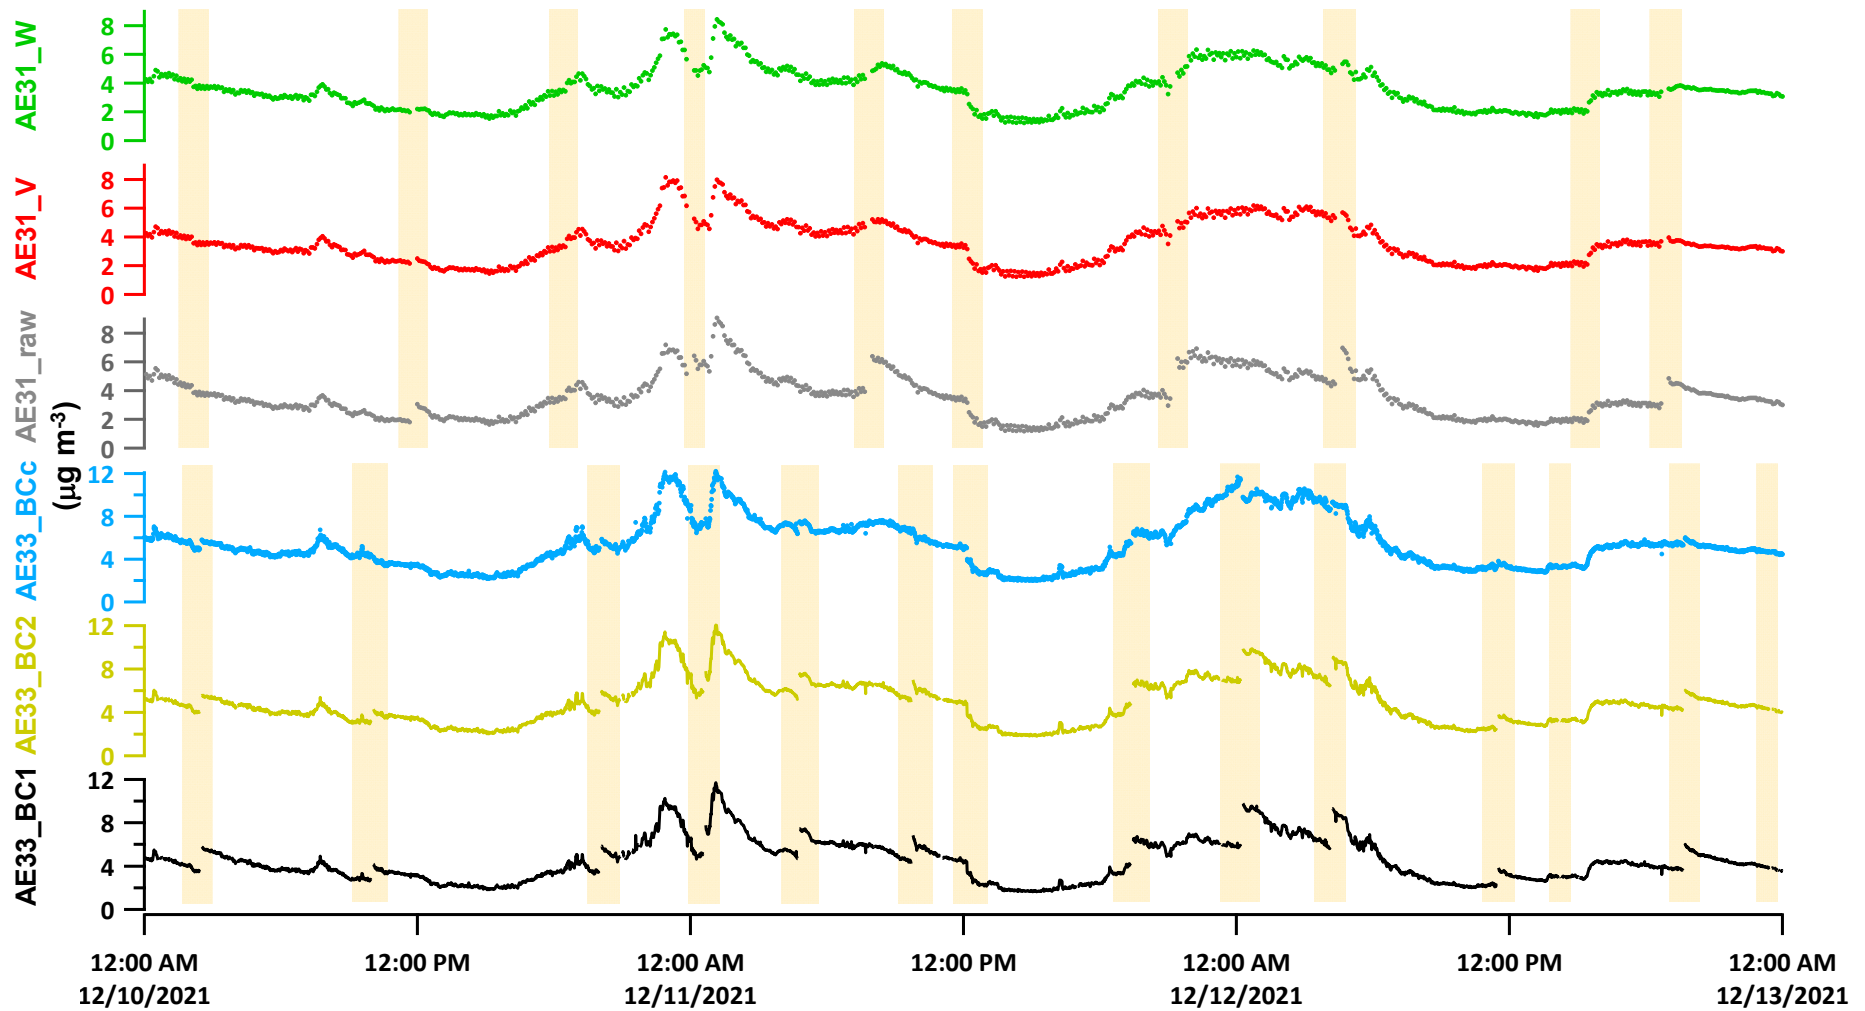

**Figure S3.** Example of Aethalometer eBC data before and after correction. The shaded areas indicate the change of sampling spot to a new position. AE31\_V and AE31\_W represent AE31 data corrected by Virkkula and Weingartner algorithms, respectively.

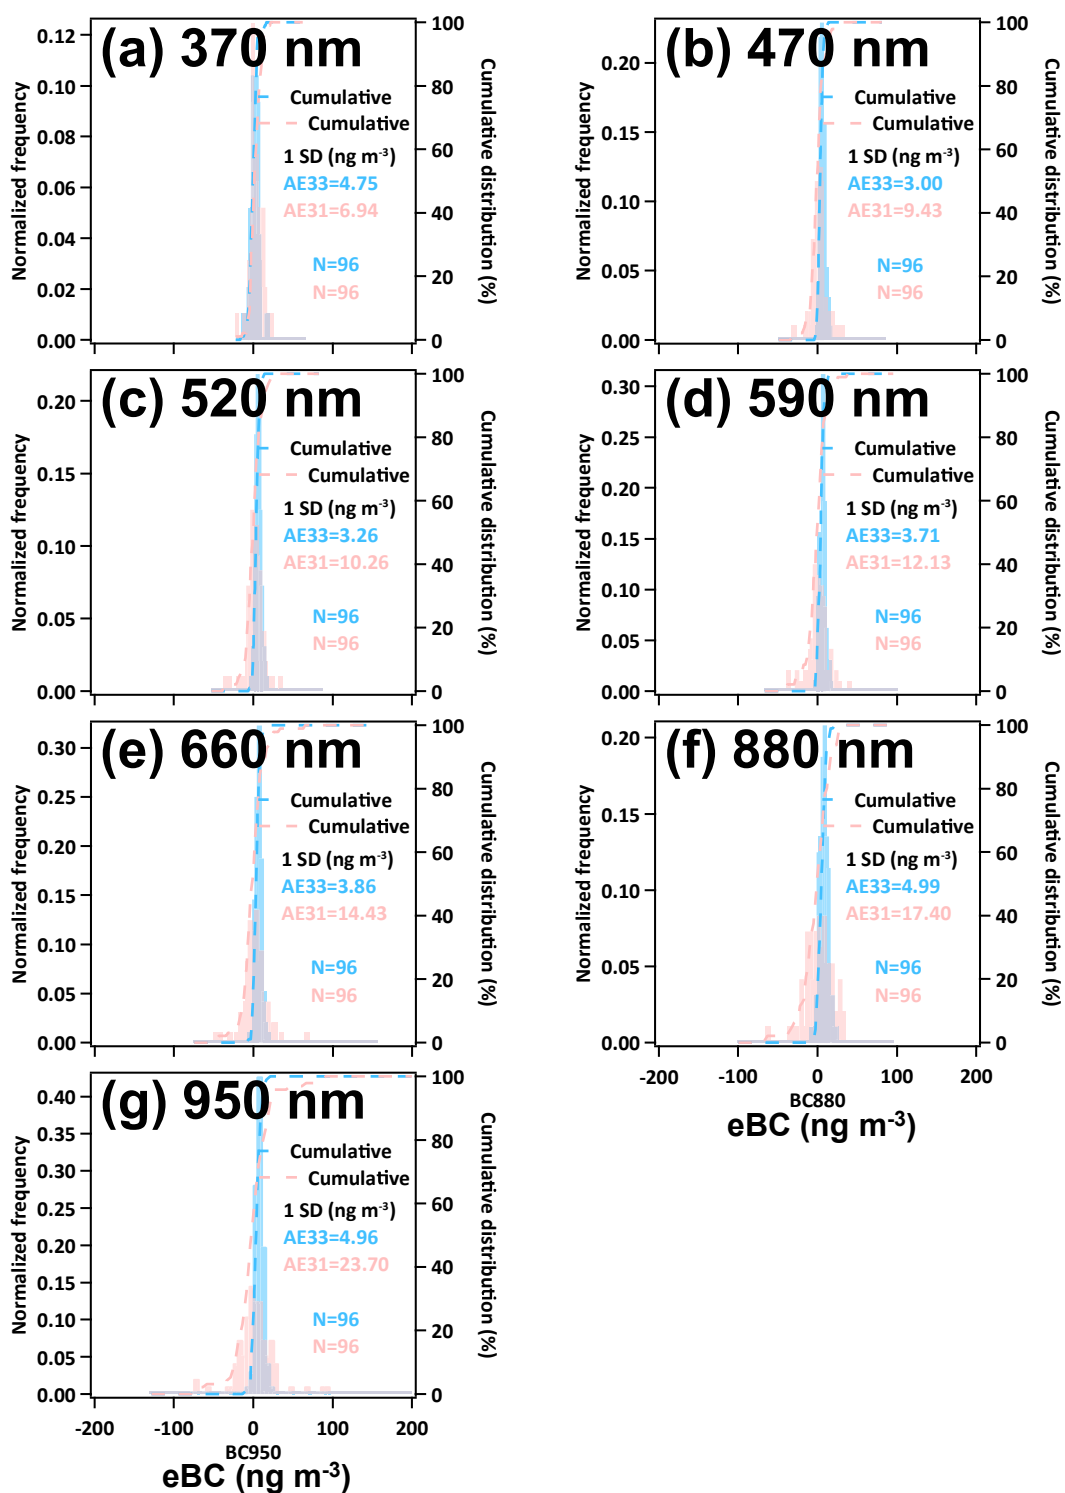

**Figure S4.** The frequency histograms of the blank measurements of AE31 and AE33 at the time base of 60 min. The red histograms represent AE31 and AE33 results are shown in blue histograms. Figures a-g correspond to 370, 470, 520, 590, 660, 880 and 950 nm, respectively.



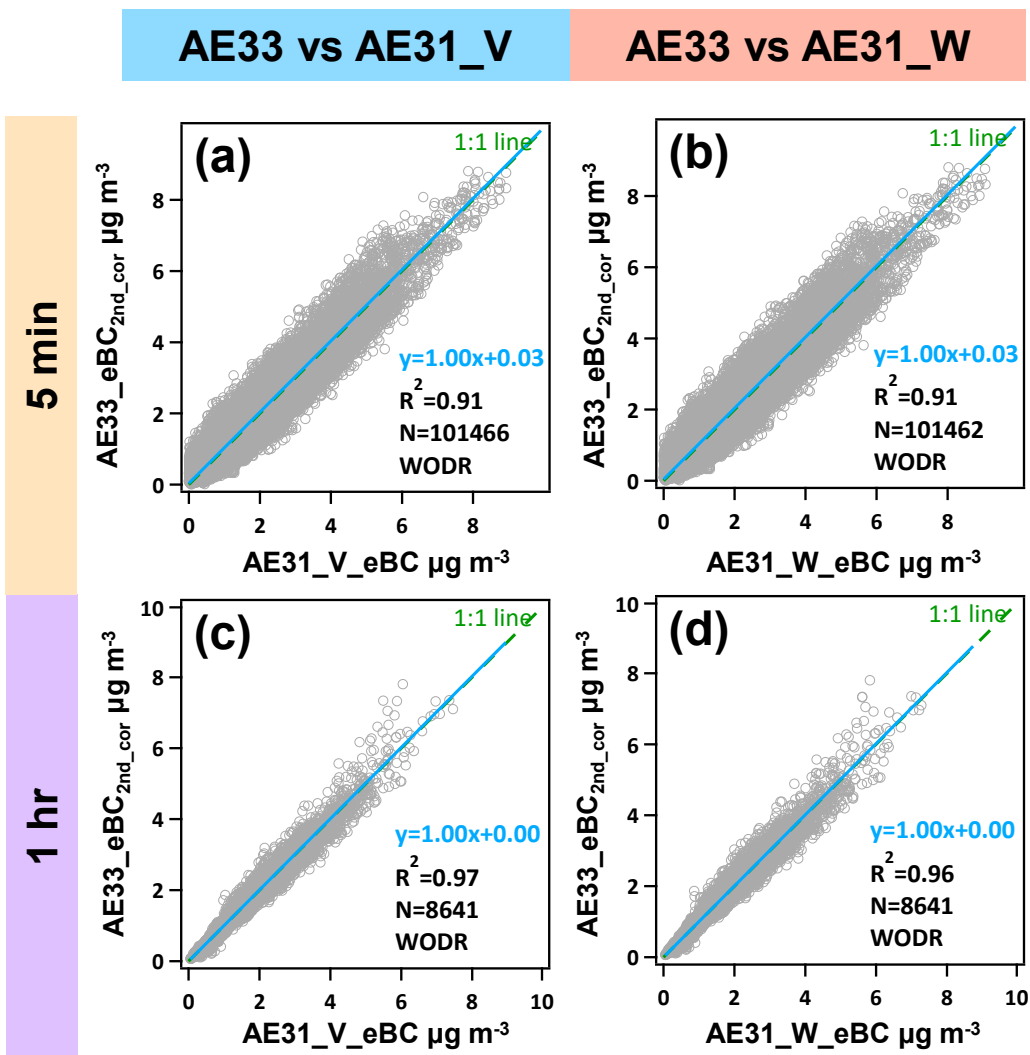

**Figure S5.** The 2nd-correction eBC mass concentration comparison between AE33 data and AE31 data at 5 min and 1 hr time base.

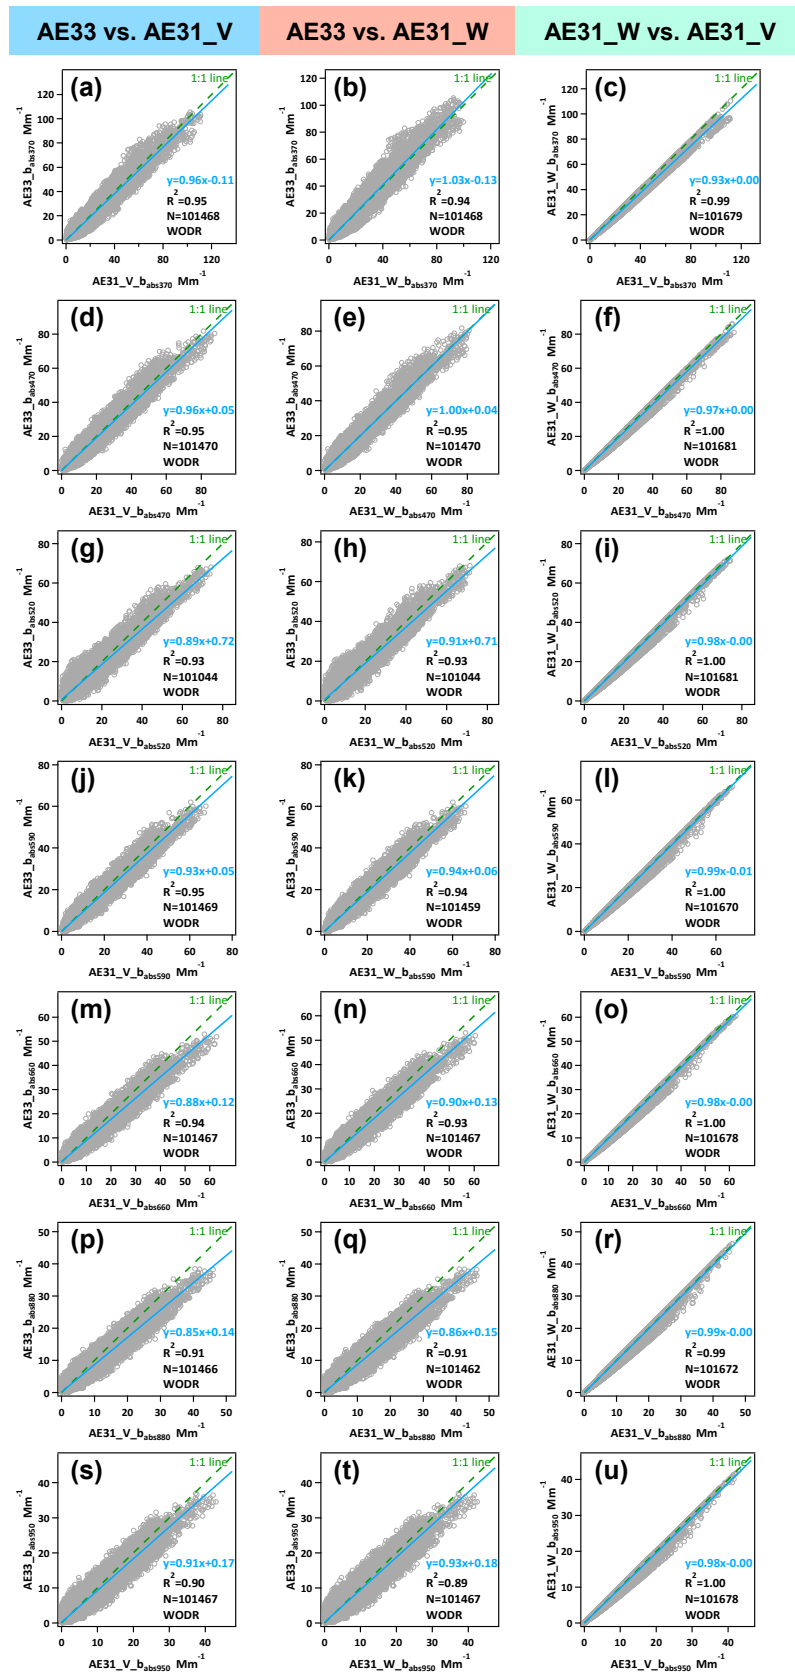

**Figure S6.** Comparisons of 5 min light absorption coefficient between AE33 and AE31 at 370, 470, 520, 590, 660, 880 and 950 nm. AE31\_V\_b<sub>abs</sub> and AE31\_W\_b<sub>abs</sub> represent the light absorption coefficients of AE31 corrected by the algorithms of Virkkula and Weingartner, respectively.

# AAE comparison: 5 min data

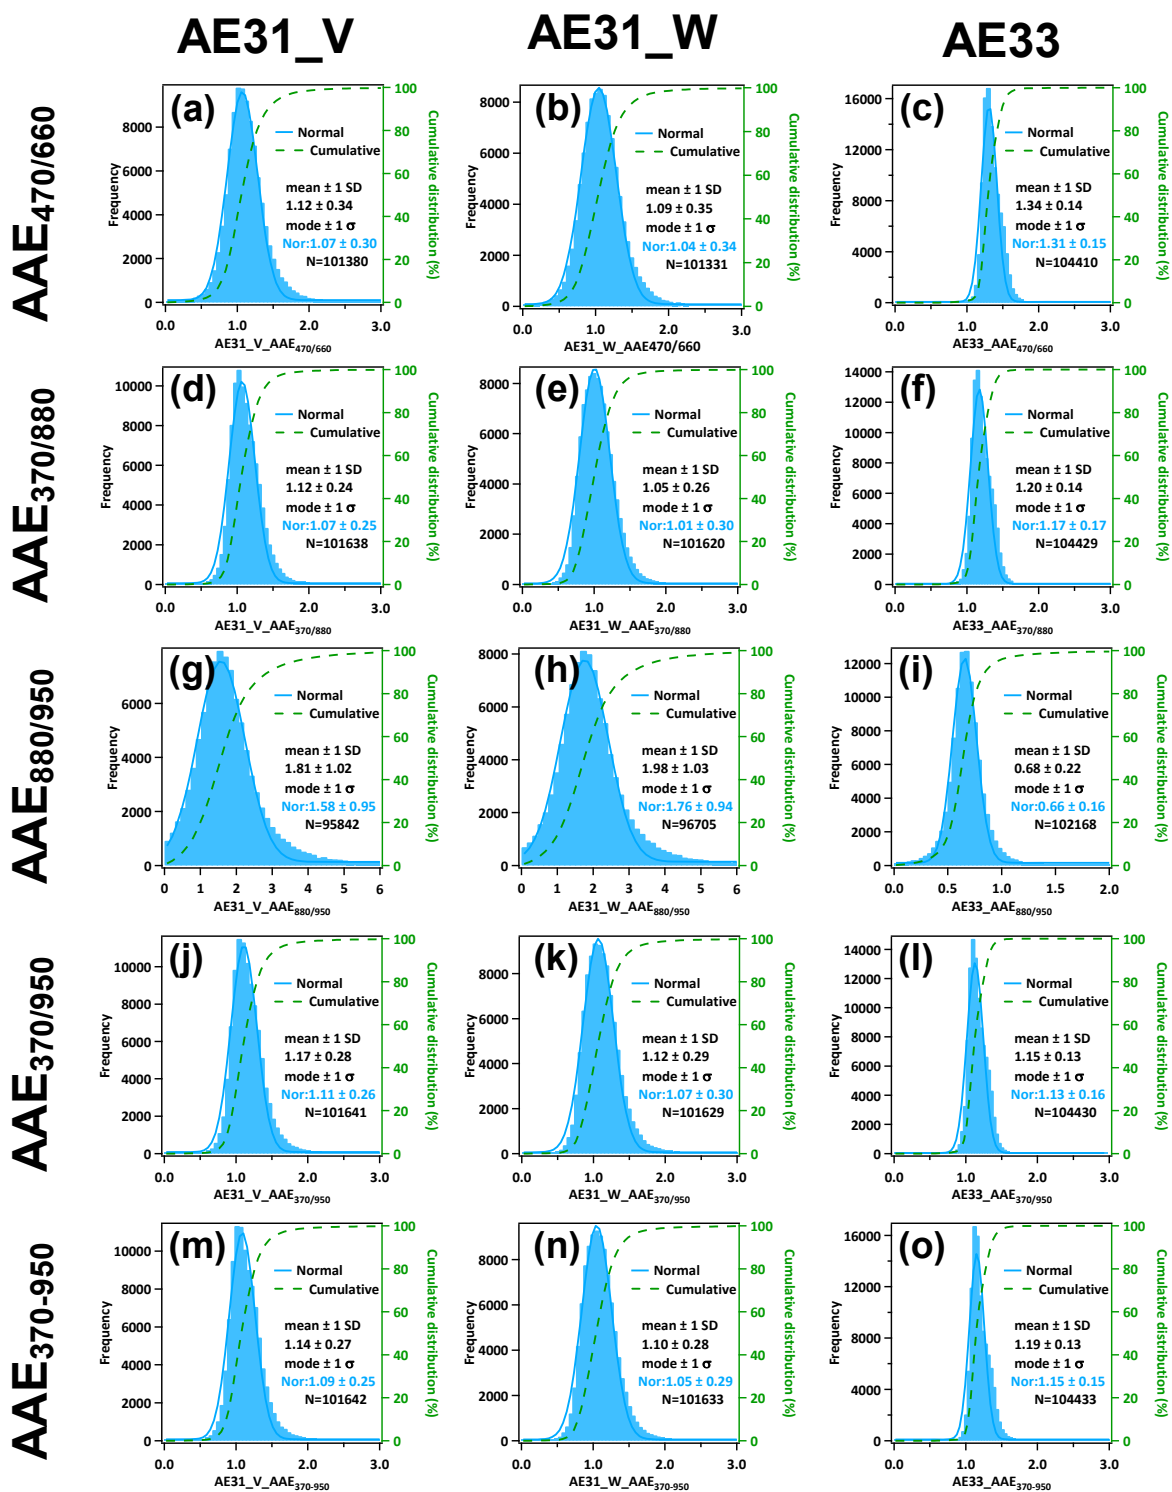

**Figure S7.** Frequency distributions of AAE values of AE33, AE31\_V (AE31 data corrected by Virkkula algorithms), and AE31\_W (AE31 data corrected by Weingartner algorithms) at 5 min time base. Here "/" denotes the AAE value calculated by the light absorption coefficients of two wavelengths (approach 1) and "-" denotes the AAE value obtained by curve fitting of seven wavelengths (approach 2).

# AAE comparison: 1 hr data

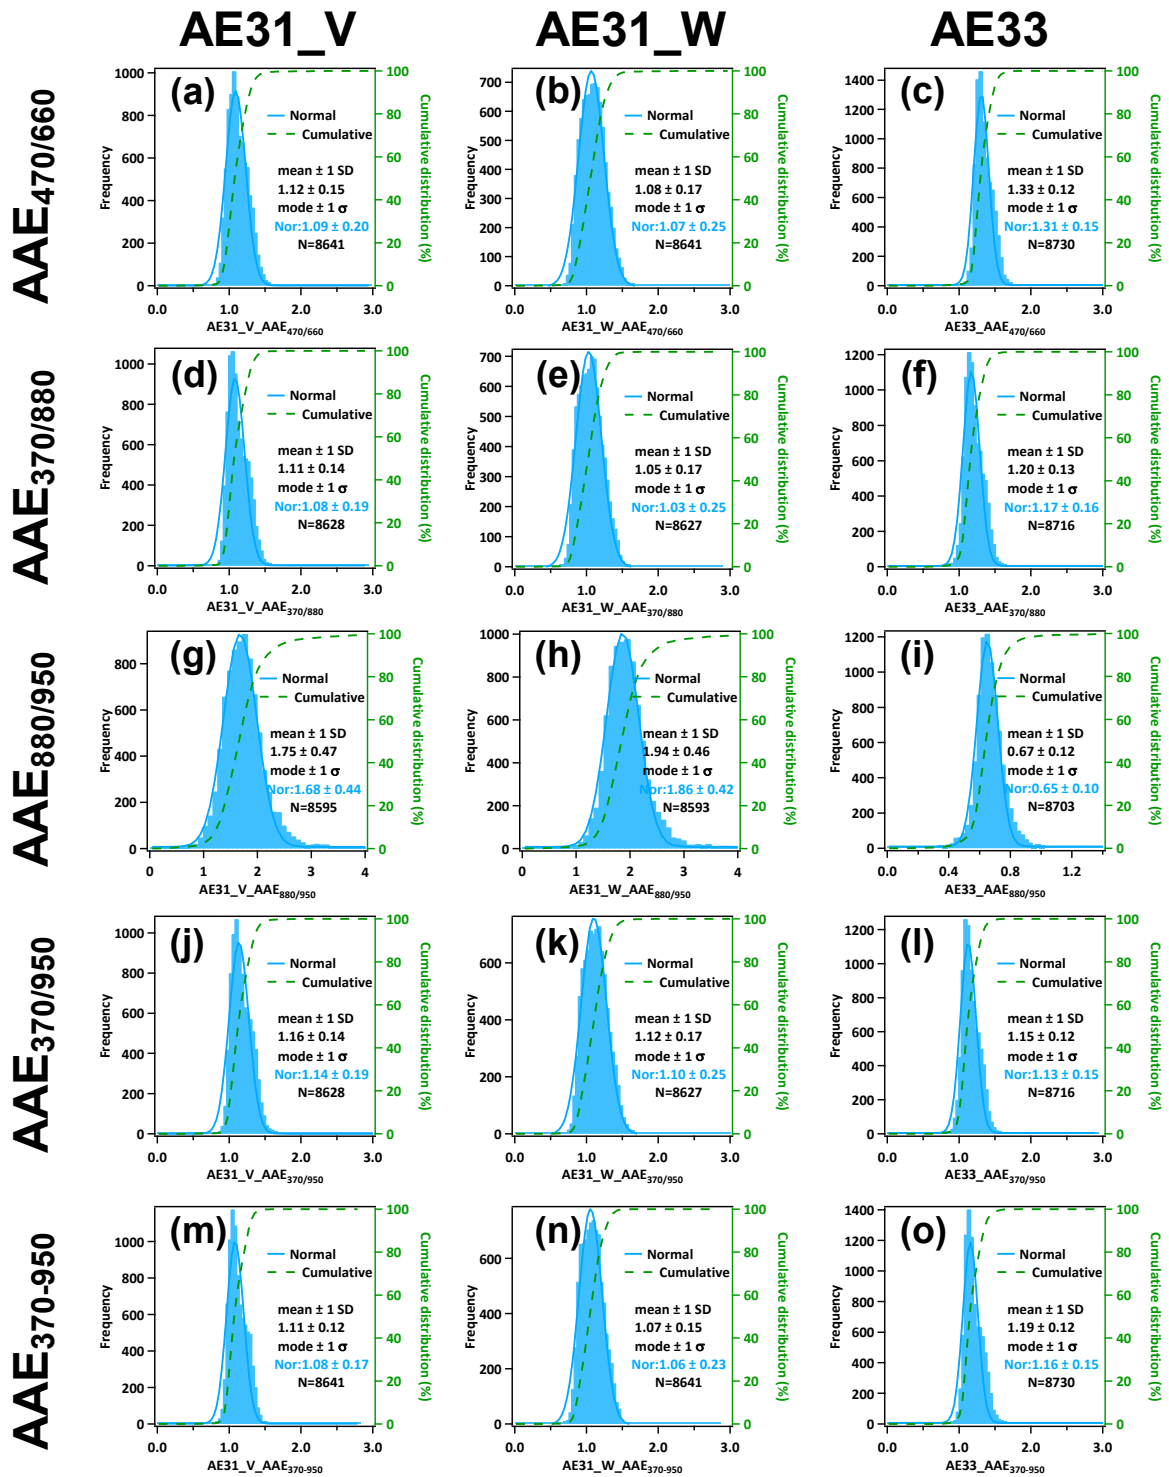

**Figure S8.** Frequency distributions of AAE values of AE33, AE31\_V (AE31 corrected by the algorithms of Virkkula), and AE31\_W (AE31 corrected by the algorithms of Weingartner) at 1 hr time base. Here "/" denotes the AAE value calculated by the light absorption coefficients of two wavelengths (approach 1) and "-" denotes the AAE value obtained by curve fitting of seven wavelengths (approach 2).

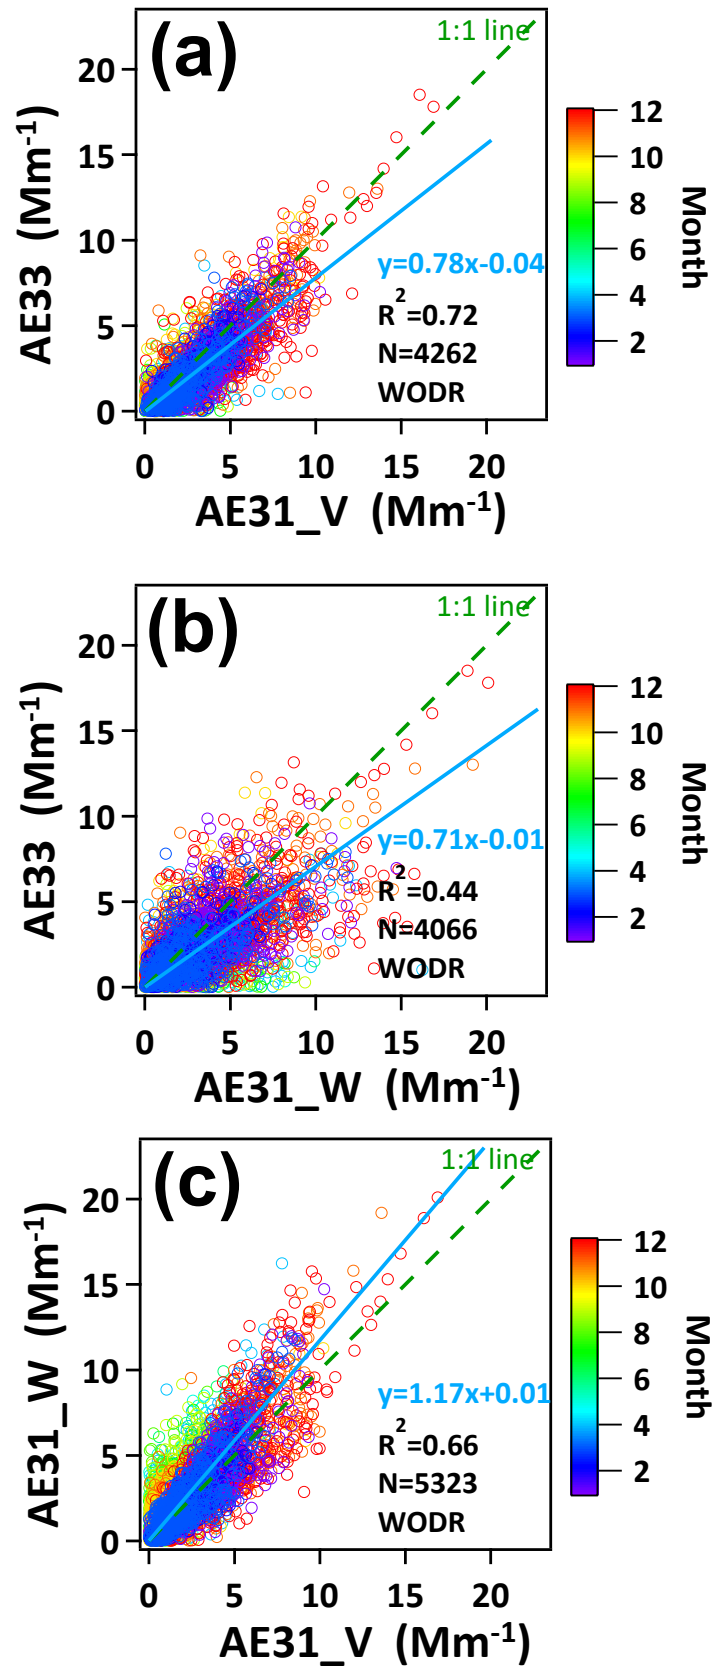

**Figure S9.** Scatter plot of  $b_{\text{abs}370\_BrC_{\text{sec}}}$  between AE31\_V, AE31\_W and AE33.

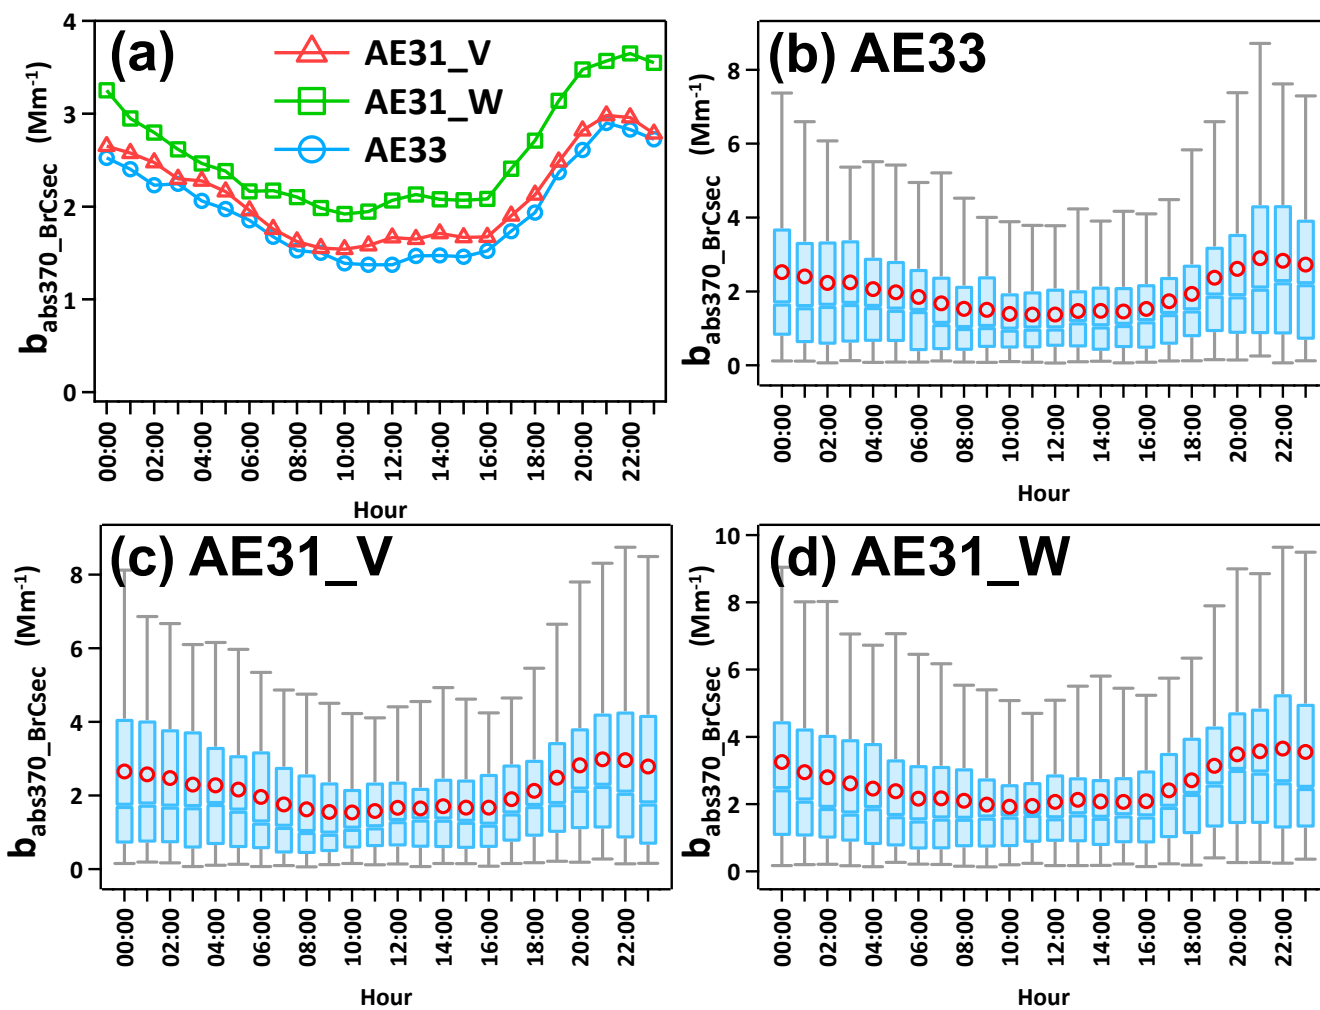

**Figure S10.** Diurnal variation of  $b_{\text{abs370\_BrCsec}}$  with hourly time base. AE31\_V and AE31\_W represent the AE31 data corrected with algorithms of d and Weingartner, respectively.

## References:

- Ajtai, T., Kiss-Albert, G., Utry, N., Tóth, Á., Hoffer, A., Szabó, G., and Bozóki, Z.: Diurnal variation of aethalometer correction factors and optical absorption assessment of nucleation events using multi-wavelength photoacoustic spectroscopy, *J. Environ. Sci.*, 83, 96-109, doi: <https://doi.org/10.1016/j.jes.2019.01.022>, 2019.
- Arnott, W. P., Hamasha, K., Moosmüller, H., Sheridan, P. J., and Ogren, J. A.: Towards Aerosol Light-Absorption Measurements with a 7-Wavelength Aethalometer: Evaluation with a Photoacoustic Instrument and 3-Wavelength Nephelometer, *Aerosol Science and Technology*, 39, 17-29, doi: <https://doi.org/10.1080/027868290901972>, 2005.
- Backman, J., Schmeisser, L., Virkkula, A., Ogren, J. A., Asmi, E., Starkweather, S., Sharma, S., Eleftheriadis, K., Uttal, T., Jefferson, A., Bergin, M., Makshtas, A., Tunved, P., and Fiebig, M.: On Aethalometer measurement uncertainties and an instrument correction factor for the Arctic, *Atmos. Meas. Tech.*, 10, 5039-5062, doi: <https://doi.org/10.5194/amt-10-5039-2017>, 2017.
- Bernardoni, V., Ferrero, L., Bolzacchini, E., Forello, A. C., Gregorič, A., Massabò, D., Močnik, G., Prati, P., Rigler, M., Santagostini, L., Soldan, F., Valentini, S., Valli, G., and Vecchi, R.: Determination of Aethalometer multiple-scattering enhancement parameters and impact on source apportionment during the winter 2017/18 EMEP/ACTRIS/COLOSSAL campaign in Milan, *Atmos. Meas. Tech.*, 14, 2919-2940, doi: <https://doi.org/10.5194/amt-14-2919-2021>, 2021.
- Collaud Coen, M., Weingartner, E., Apituley, A., Ceburnis, D., Fierz-Schmidhauser, R., Flentje, H., Henzing, J. S., Jennings, S. G., Moerman, M., Petzold, A., Schmid, O., and Baltensperger, U.: Minimizing light absorption measurement artifacts of the Aethalometer: evaluation of five correction algorithms, *Atmos. Meas. Tech.*, 3, 457-474, doi: <https://doi.org/10.5194/amt-3-457-2010>, 2010.
- Di Biagio, C., Formenti, P., Cazaunau, M., Pangui, E., Marchand, N., and Doussin, J. F.: Aethalometer multiple scattering correction Cref for mineral dust aerosols, *Atmos. Meas. Tech.*, 10, 2923-2939, doi: <https://doi.org/10.5194/amt-10-2923-2017>, 2017.
- Drinovec, L., Močnik, G., Zotter, P., Prévôt, A. S. H., Ruckstuhl, C., Coz, E., Rupakheti, M., Sciare, J., Müller, T., Wiedensohler, A., and Hansen, A. D. A.: The "dual-spot" Aethalometer: an improved measurement of aerosol black carbon with real-time loading compensation, *Atmos. Meas. Tech.*, 8, 1965-1979, doi: <https://doi.org/10.5194/amt-8-1965-2015>, 2015.
- Laing, J. R., Jaffe, D. A., and Sedlacek, I. I. A. J.: Comparison of Filter-based Absorption Measurements of Biomass Burning Aerosol and Background Aerosol at the Mt. Bachelor Observatory, *Aerosol. Air. Qual. Res.*, 20, 663-678, doi: <https://doi.org/10.4209/aaqr.2019.06.0298>, 2020.
- Lim, S., Lee, M., Kim, S.-W., and Laj, P.: Sulfate alters aerosol absorption properties in East Asian outflow, *Scientific Reports*, 8, 5172, doi: <https://doi.org/10.1038/s41598-018-23021-1>, 2018.
- Qin, Y. M., Tan, H. B., Li, Y. J., Li, Z. J., Schurman, M. I., Liu, L., Wu, C., and Chan, C. K.: Chemical characteristics of brown carbon in atmospheric particles at a suburban site near Guangzhou, China, *Atmos. Chem. Phys.*, 18, 16409-16418, doi: <https://doi.org/10.5194/acp-18-16409-2018>, 2018.
- Saturno, J., Pöhlker, C., Massabò, D., Brito, J., Carbone, S., Cheng, Y., Chi, X., Ditas, F., Hrabě de Angelis, I., Morán-Zuloaga, D., Pöhlker, M. L., Rizzo, L. V., Walter, D., Wang, Q., Artaxo, P., Prati, P., and Andreae, M. O.: Comparison of different Aethalometer correction schemes and a reference multi-wavelength absorption technique for ambient aerosol data, *Atmos. Meas. Tech.*, 10, 2837-2850, doi: <https://doi.org/10.5194/amt-10-2837-2017>, 2017.
- Schmid, O., Artaxo, P., Arnott, W. P., Chand, D., Gatti, L. V., Frank, G. P., Hoffer, A., Schnaiter, M., and Andreae, M. O.: Spectral light absorption by ambient aerosols influenced by biomass burning in the Amazon

Basin. I: Comparison and field calibration of absorption measurement techniques, *Atmos. Chem. Phys.*, 6, 3443-3462, doi: <https://doi.org/10.5194/acp-6-3443-2006>, 2006.

Segura, S., Estellés, V., Titos, G., Lyamani, H., Utrillas, M. P., Zotter, P., Prévôt, A. S. H., Močnik, G., Alados-Arboledas, L., and Martínez-Lozano, J. A.: Determination and analysis of in situ spectral aerosol optical properties by a multi-instrumental approach, *Atmos. Meas. Tech.*, 7, 2373-2387, doi: <https://doi.org/10.5194/amt-7-2373-2014>, 2014.

Valentini, S., Barnaba, F., Bernardoni, V., Calzolari, G., Costabile, F., Di Liberto, L., Forello, A. C., Gobbi, G. P., Gualtieri, M., Lucarelli, F., Nava, S., Petralia, E., Valli, G., Wiedensohler, A., and Vecchi, R.: Classifying aerosol particles through the combination of optical and physical-chemical properties: Results from a wintertime campaign in Rome (Italy), *Atmospheric Research*, 235, 104799, doi: <https://doi.org/https://doi.org/10.1016/j.atmosres.2019.104799>, 2020.

Weingartner, E., Saathoff, H., Schnaiter, M., Streit, N., Bitnar, B., and Baltensperger, U.: Absorption of light by soot particles: determination of the absorption coefficient by means of aethalometers, *J. Aerosol. Sci.*, 34, 1445-1463, doi: [https://doi.org/10.1016/S0021-8502\(03\)00359-8](https://doi.org/10.1016/S0021-8502(03)00359-8), 2003.

Wu, D., Wu, C., Liao, B., Chen, H., Wu, M., Li, F., Tan, H., Deng, T., Li, H., Jiang, D., and Yu, J. Z.: Black carbon over the South China Sea and in various continental locations in South China, *Atmos. Chem. Phys.*, 13, 12257-12270, doi: <https://doi.org/10.5194/acp-13-12257-2013>, 2013.

Zhang, Y., Zhi, G., Jin, W., Liu, S., Wang, L., Li, Z., Shi, R., Zhang, P., Shu, Y., and Hu, J.: Developing a dynamic correction mechanism for aethalometer results of actual urban aerosols, *Atmos. Res.*, 255, 105529, doi: <https://doi.org/10.1016/j.atmosres.2021.105529>, 2021.

Zhao, G., Yu, Y., Tian, P., Li, J., Guo, S., and Zhao, C.: Evaluation and Correction of the Ambient Particle Spectral Light Absorption Measured Using a Filter-based Aethalometer, *Aerosol and Air Quality Research*, 20, 1833-1841, doi: <https://doi.org/10.4209/aaqr.2019.10.0500>, 2020.
